# Supplementary material for: Structural, magnetic and photoluminescence properties of new hybrid hypophosphites: discovery of the first noncentrosymmetric and two cobalt-based members
Source: Royal Society of Chemistry journal article supplement (doi:10.1039/d2dt01212j), 2022-01-01
Supplement: d2dt01212j1.pdf [file d2dt01212j1.pdf]

" Structural, magnetic and photoluminescent properties of new hybrid  
hypophosphites: discovery of the first noncentrosymmetric and two cobalt-based  
members "

by Mirosław Mączka,<sup>\*a</sup> Anna Gągor,<sup>a</sup> Dagmara Stefańska,<sup>a</sup> Jan K. Zaręba<sup>b</sup> and Adam Pikul<sup>a</sup>

*<sup>a</sup>Institute of Low Temperature and Structure Research, Polish Academy of Sciences, ul. Okólna 2, 50-422 Wrocław,  
Poland*

*<sup>b</sup>Institute of Advanced Materials, Wrocław University of Science and Technology, Wybrzeże Wyspiańskiego 27, 50-  
370 Wrocław, Poland*

e-mail: [m.maczka@intibs.pl](mailto:m.maczka@intibs.pl)

**Table S1.** Experimental details.

Experiments were carried out with Mo  $K\alpha$  radiation using an Xcalibur, Atlas. H atoms were treated by a mixture of independent and constrained refinement. Absorption was corrected using Multi-scan *CrysAlis PRO* 1.171.38.41 (Rigaku Oxford Diffraction, 2015) Empirical absorption correction using spherical harmonics, implemented in SCALE3 ABSPACK scaling algorithm. Computer programs: *CrysAlis PRO* 1.171.38.41 (Rigaku OD, 2015), *CrysAlis PRO* 1.171.39.46 (Rigaku OD, 2018), *SHELXT* 2014/5 (Sheldrick, 2014), *SHELXT* 2018/2 (Sheldrick, 2018), *SHELXL* 2018/3 (Sheldrick, 2015), *Olex2* 1.5 (Dolomanov et al., 2009).

|                                                                             | [GUA]Cd(H <sub>2</sub> POO) <sub>3</sub>                                       | [GUA]Co(H <sub>2</sub> POO) <sub>3</sub>                                       | [IM]Cd(H <sub>2</sub> POO) <sub>3</sub>                                                      | [IM]Co(H <sub>2</sub> POO) <sub>3</sub>                                                      |
|-----------------------------------------------------------------------------|--------------------------------------------------------------------------------|--------------------------------------------------------------------------------|----------------------------------------------------------------------------------------------|----------------------------------------------------------------------------------------------|
| <b>Crystal data</b>                                                         |                                                                                |                                                                                |                                                                                              |                                                                                              |
| Chemical formula                                                            | CdH <sub>6</sub> O <sub>6</sub> P <sub>3</sub> ·CH <sub>6</sub> N <sub>3</sub> | CoH <sub>6</sub> O <sub>6</sub> P <sub>3</sub> ·CH <sub>6</sub> N <sub>3</sub> | CdH <sub>6</sub> O <sub>6</sub> P <sub>3</sub> ·C <sub>3</sub> H <sub>5</sub> N <sub>2</sub> | CoH <sub>6</sub> O <sub>6</sub> P <sub>3</sub> ·C <sub>3</sub> H <sub>5</sub> N <sub>2</sub> |
| $M_r$                                                                       | 367.45                                                                         | 313.98                                                                         | 376.45                                                                                       | 322.98                                                                                       |
| Crystal system, space group                                                 | Trigonal, <i>R-3c</i>                                                          | Monoclinic, <i>I2/m</i>                                                        | Monoclinic, <i>P2<sub>1</sub>/c</i>                                                          | Orthorhombic, <i>Pbca</i>                                                                    |
| Temperature (K)                                                             | 293                                                                            | 293                                                                            | 298                                                                                          | 295                                                                                          |
| $a, b, c$ (Å)                                                               | 9.2500 (2),<br>9.2500 (2),<br>23.0532 (6)                                      | 8.6597 (4),<br>13.0778 (6),<br>9.4000 (5)                                      | 9.8832 (3),<br>12.8778 (3),<br>18.6407 (7)                                                   | 13.2731 (3),<br>12.4955 (3),<br>13.2763 (3)                                                  |
| $\alpha, \beta, \gamma$ (°)                                                 | 90, 90, 120                                                                    | 90, 90.623 (5), 90                                                             | 90, 92.082 (3), 90                                                                           | 90, 90, 90                                                                                   |
| $V$ (Å <sup>3</sup> )                                                       | 1708.23 (9)                                                                    | 1064.49 (9)                                                                    | 2370.91 (13)                                                                                 | 2201.93 (9)                                                                                  |
| $Z$                                                                         | 6                                                                              | 4                                                                              | 8                                                                                            | 8                                                                                            |
| $\mu$ (mm <sup>-1</sup> )                                                   | 2.35                                                                           | 2.07                                                                           | 2.26                                                                                         | 2.00                                                                                         |
| Crystal size (mm)                                                           | 0.21 × 0.15 × 0.10                                                             | 0.26 × 0.21 × 0.12                                                             | 0.21 × 0.15 × 0.08                                                                           | 0.11 × 0.07 × 0.05                                                                           |
| <b>Data collection</b>                                                      |                                                                                |                                                                                |                                                                                              |                                                                                              |
| No. of measured, independent, and observed [ $I > 2\sigma(I)$ ] reflections | 11397, 523, 494                                                                | 5023, 1379, 1246                                                               | 18612, 4207, 3609                                                                            | 33671, 2259, 1900                                                                            |
| $R_{int}$                                                                   | 0.031                                                                          | 0.021                                                                          | 0.029                                                                                        | 0.045                                                                                        |
| $(\sin \theta/\lambda)_{max}$ (Å <sup>-1</sup> )                            | 0.693                                                                          | 0.689                                                                          | 0.610                                                                                        | 0.625                                                                                        |
| <b>Refinement</b>                                                           |                                                                                |                                                                                |                                                                                              |                                                                                              |
| $R[F^2 > 2\sigma(F^2)]$ , $wR(F^2)$ , $S$                                   | 0.018, 0.045, 1.08                                                             | 0.023, 0.062, 1.10                                                             | 0.024, 0.055, 1.05                                                                           | 0.026, 0.058, 1.07                                                                           |
| No. of reflections                                                          | 523                                                                            | 1379                                                                           | 4207                                                                                         | 2259                                                                                         |
| No. of parameters                                                           | 29                                                                             | 86                                                                             | 308                                                                                          | 168                                                                                          |
| No. of restraints                                                           | 0                                                                              | 0                                                                              | 0                                                                                            | 0                                                                                            |
| $\Delta\rho_{max}, \Delta\rho_{min}$ (e Å <sup>-3</sup> )                   | 0.53, -0.74                                                                    | 0.33, -0.51                                                                    | 0.74, -0.47                                                                                  | 0.30, -0.35                                                                                  |

|                                                                                                                |                                                                                  |
|----------------------------------------------------------------------------------------------------------------|----------------------------------------------------------------------------------|
|                                                                                                                | [PYR]Cd(H <sub>2</sub> POO) <sub>3</sub>                                         |
| <b>Crystal data</b>                                                                                            |                                                                                  |
| Chemical formula                                                                                               | CdH <sub>6</sub> O <sub>6</sub> P <sub>3</sub> ·C <sub>4</sub> H <sub>10</sub> N |
| <i>M<sub>r</sub></i>                                                                                           | 379.49                                                                           |
| Crystal system, space group                                                                                    | Orthorhombic, <i>Aea</i> 2                                                       |
| Temperature (K)                                                                                                | 295                                                                              |
| <i>a</i> , <i>b</i> , <i>c</i> (Å)                                                                             | 12.8565 (1), 13.9166 (2), 13.6699 (2)                                            |
| α, β, γ (°)                                                                                                    | 90, 90, 90                                                                       |
| <i>V</i> (Å <sup>3</sup> )                                                                                     | 2445.80 (5)                                                                      |
| <i>Z</i>                                                                                                       | 8                                                                                |
| μ (mm <sup>-1</sup> )                                                                                          | 2.19                                                                             |
| Crystal size (mm)                                                                                              | 0.19 × 0.18 × 0.15                                                               |
| <b>Data collection</b>                                                                                         |                                                                                  |
| No. of measured, independent, and observed [ <i>I</i> > 2σ( <i>I</i> )] reflections                            | 51641, 3297, 3227                                                                |
| <i>R</i> <sub>int</sub>                                                                                        | 0.019                                                                            |
| (sin θ/λ) <sub>max</sub> (Å <sup>-1</sup> )                                                                    | 0.694                                                                            |
| <b>Refinement</b>                                                                                              |                                                                                  |
| <i>R</i> [ <i>F</i> <sup>2</sup> > 2σ( <i>F</i> <sup>2</sup> )], <i>wR</i> ( <i>F</i> <sup>2</sup> ), <i>S</i> | 0.016, 0.042, 1.14                                                               |
| No. of reflections                                                                                             | 3297                                                                             |
| No. of parameters                                                                                              | 150                                                                              |
| No. of restraints                                                                                              | 1                                                                                |
| Δ <sub>max</sub> , Δ <sub>min</sub> (e Å <sup>-3</sup> )                                                       | 0.61, -0.64                                                                      |
| Absolute structure                                                                                             | Refined as an inversion twin.                                                    |
| Absolute structure parameter                                                                                   | 0.38 (2)                                                                         |

**Table S2.** Selected geometric parameters (Å, °).

|                                          |             |                     |             |
|------------------------------------------|-------------|---------------------|-------------|
| [GUA]Cd(H <sub>2</sub> POO) <sub>3</sub> |             |                     |             |
| Cd1—O1 <sup>i</sup>                      | 2.3001 (12) | Cd1—O1 <sup>v</sup> | 2.3002 (12) |
| Cd1—O1                                   | 2.3001 (12) | P1—O1               | 1.5068 (13) |
| Cd1—O1 <sup>ii</sup>                     | 2.3001 (12) | P1—O1 <sup>vi</sup> | 1.5069 (13) |
| Cd1—O1 <sup>iii</sup>                    | 2.3002 (12) | N1—C1               | 1.319 (2)   |
| Cd1—O1 <sup>iv</sup>                     | 2.3002 (13) |                     |             |
| [GUA]Co(H <sub>2</sub> POO) <sub>3</sub> |             |                     |             |
| Co1—O1                                   | 2.0663 (12) | P2—O2               | 1.5013 (12) |
| Co1—O1 <sup>vii</sup>                    | 2.0663 (12) | P1—O1               | 1.5060 (13) |
| Co1—O2 <sup>vii</sup>                    | 2.1926 (12) | P1—O1 <sup>ix</sup> | 1.5061 (13) |
| Co1—O2                                   | 2.1926 (12) | P3—O3               | 1.4929 (13) |
| Co1—O3                                   | 2.0965 (13) | P3—O3 <sup>x</sup>  | 1.4929 (13) |
| Co1—O3 <sup>vii</sup>                    | 2.0965 (13) | N1—C1               | 1.328 (3)   |
| P2—O2 <sup>viii</sup>                    | 1.5013 (12) | N2—C1               | 1.324 (2)   |
| [IM]Cd(H <sub>2</sub> POO) <sub>3</sub>  |             |                     |             |
| Cd1—O2                                   | 2.303 (2)   | P3—O6               | 1.481 (3)   |
| Cd1—O4                                   | 2.254 (2)   | P4—O7               | 1.480 (2)   |
| Cd1—O8                                   | 2.249 (2)   | P4—O8               | 1.488 (2)   |
| Cd1—O10                                  | 2.286 (2)   | P5—O9               | 1.486 (3)   |
| Cd1—O12                                  | 2.257 (3)   | P5—O10              | 1.486 (2)   |
| Cd1—O6                                   | 2.277 (2)   | P6—O11              | 1.486 (3)   |
| Cd2—O1 <sup>xi</sup>                     | 2.299 (2)   | P6—O12              | 1.452 (3)   |
| Cd2—O3 <sup>xii</sup>                    | 2.267 (2)   | N8—C9               | 1.359 (4)   |
| Cd2—O5 <sup>xiii</sup>                   | 2.307 (2)   | N8—C7               | 1.305 (4)   |
| Cd2—O9 <sup>xiv</sup>                    | 2.281 (2)   | N6—C7               | 1.304 (4)   |
| Cd2—O7                                   | 2.257 (2)   | N6—C10              | 1.358 (4)   |
| Cd2—O11 <sup>xv</sup>                    | 2.283 (2)   | N3—C2               | 1.310 (4)   |
| P1—O2                                    | 1.496 (2)   | N3—C4               | 1.361 (4)   |
| P1—O1                                    | 1.496 (2)   | N1—C2               | 1.309 (4)   |
| P2—O3                                    | 1.495 (2)   | N1—C5               | 1.362 (5)   |
| P2—O4                                    | 1.482 (2)   | C9—C10              | 1.339 (5)   |
| P3—O5                                    | 1.494 (2)   | C4—C5               | 1.335 (5)   |
| [IM]Co(H <sub>2</sub> POO) <sub>3</sub>  |             |                     |             |

|                                          |             |                                          |             |
|------------------------------------------|-------------|------------------------------------------|-------------|
| Co1—O2                                   | 2.1041 (15) | P2—O3                                    | 1.4880 (16) |
| Co1—O4                                   | 2.1129 (15) | P3—O6                                    | 1.4950 (17) |
| Co1—O3 <sup>xvi</sup>                    | 2.1270 (15) | P3—O5                                    | 1.4860 (17) |
| Co1—O6                                   | 2.0852 (16) | N1—C1                                    | 1.364 (3)   |
| Co1—O5 <sup>xvii</sup>                   | 2.0983 (16) | N1—C2                                    | 1.310 (3)   |
| Co1—O1 <sup>xviii</sup>                  | 2.0809 (17) | N2—C2                                    | 1.314 (3)   |
| P1—O2                                    | 1.4947 (16) | N2—C3                                    | 1.361 (3)   |
| P1—O1                                    | 1.4856 (18) | C1—C3                                    | 1.334 (4)   |
| P2—O4                                    | 1.4918 (16) |                                          |             |
| [PYR]Cd(H <sub>2</sub> POO) <sub>3</sub> |             |                                          |             |
| Cd1—O6 <sup>xix</sup>                    | 2.3198 (17) | P3—O3                                    | 1.496 (3)   |
| Cd1—O1                                   | 2.256 (2)   | P3—O5                                    | 1.476 (4)   |
| Cd1—O2                                   | 2.260 (2)   | P1—O6                                    | 1.493 (2)   |
| Cd1—O3                                   | 2.338 (2)   | P1—O1                                    | 1.473 (5)   |
| Cd1—O4                                   | 2.269 (2)   | C1—N1                                    | 1.489 (4)   |
| Cd1—O5 <sup>xx</sup>                     | 2.287 (3)   | C1—C2                                    | 1.480 (5)   |
| P4—O4 <sup>xxi</sup>                     | 1.492 (2)   | N1—C4                                    | 1.478 (4)   |
| P4—O4                                    | 1.492 (2)   | C4—C3                                    | 1.501 (5)   |
| P2—O2 <sup>xxii</sup>                    | 1.489 (2)   | C2—C3                                    | 1.521 (6)   |
| P2—O2                                    | 1.489 (2)   |                                          |             |
| [GUA]Cd(H <sub>2</sub> POO) <sub>3</sub> |             |                                          |             |
| O1 <sup>i</sup> —Cd1—O1 <sup>iii</sup>   | 88.67 (5)   | O1 <sup>v</sup> —Cd1—O1 <sup>ii</sup>    | 88.66 (5)   |
| O1 <sup>iv</sup> —Cd1—O1 <sup>ii</sup>   | 180.0       | O1 <sup>iii</sup> —Cd1—O1 <sup>v</sup>   | 91.33 (5)   |
| O1 <sup>iv</sup> —Cd1—O1                 | 88.67 (5)   | O1 <sup>iii</sup> —Cd1—O1                | 180.00 (6)  |
| O1 <sup>i</sup> —Cd1—O1 <sup>iv</sup>    | 88.66 (5)   | O1 <sup>iv</sup> —Cd1—O1 <sup>v</sup>    | 91.34 (5)   |
| O1 <sup>i</sup> —Cd1—O1                  | 91.34 (5)   | O1 <sup>ii</sup> —Cd1—O1                 | 91.34 (5)   |
| O1 <sup>iii</sup> —Cd1—O1 <sup>iv</sup>  | 91.33 (5)   | O1 <sup>i</sup> —Cd1—O1 <sup>ii</sup>    | 91.34 (5)   |
| O1 <sup>iii</sup> —Cd1—O1 <sup>ii</sup>  | 88.66 (5)   | O1 <sup>v</sup> —Cd1—O1                  | 88.67 (5)   |
| O1 <sup>i</sup> —Cd1—O1 <sup>v</sup>     | 180.0       |                                          |             |
| [GUA]Co(H <sub>2</sub> POO) <sub>3</sub> |             |                                          |             |
| O1—Co1—O1 <sup>vii</sup>                 | 180.00 (5)  | O1 <sup>vii</sup> —Co1—O3 <sup>vii</sup> | 88.34 (5)   |
| O1—Co1—O2                                | 89.40 (5)   | O2 <sup>vii</sup> —Co1—O2                | 180.0       |
| O1 <sup>vii</sup> —Co1—O2                | 90.60 (5)   | O3 <sup>vii</sup> —Co1—O2                | 88.88 (5)   |
| O1—Co1—O2 <sup>vii</sup>                 | 90.60 (5)   | O3—Co1—O2 <sup>vii</sup>                 | 88.89 (5)   |
| O1 <sup>vii</sup> —Co1—O2 <sup>vii</sup> | 89.40 (5)   | O3 <sup>vii</sup> —Co1—O2 <sup>vii</sup> | 91.12 (5)   |

|                                          |             |                                             |            |
|------------------------------------------|-------------|---------------------------------------------|------------|
| O1—Co1—O3                                | 88.34 (5)   | O3—Co1—O2                                   | 91.12 (5)  |
| O1—Co1—O3 <sup>vii</sup>                 | 91.66 (5)   | O3—Co1—O3 <sup>vii</sup>                    | 180.00 (8) |
| O1 <sup>vii</sup> —Co1—O3                | 91.66 (5)   |                                             |            |
| [IM]Cd(H <sub>2</sub> POO) <sub>3</sub>  |             |                                             |            |
| O4—Cd1—O2                                | 87.75 (8)   | O1 <sup>xi</sup> —Cd2—O5 <sup>xiii</sup>    | 177.98 (8) |
| O4—Cd1—O8                                | 174.75 (8)  | O3 <sup>xii</sup> —Cd2—O1 <sup>xi</sup>     | 88.33 (8)  |
| O4—Cd1—O10                               | 85.64 (8)   | O3 <sup>xii</sup> —Cd2—O5 <sup>xiii</sup>   | 90.21 (9)  |
| O4—Cd1—O12                               | 88.28 (9)   | O3 <sup>xii</sup> —Cd2—O9 <sup>xiv</sup>    | 87.98 (8)  |
| O4—Cd1—O6                                | 90.38 (10)  | O3 <sup>xii</sup> —Cd2—O11 <sup>xv</sup>    | 92.11 (8)  |
| O8—Cd1—O2                                | 88.01 (9)   | O9 <sup>xiv</sup> —Cd2—O1 <sup>xi</sup>     | 91.80 (9)  |
| O8—Cd1—O10                               | 91.46 (9)   | O9 <sup>xiv</sup> —Cd2—O5 <sup>xiii</sup>   | 89.54 (8)  |
| O8—Cd1—O12                               | 95.23 (9)   | O9 <sup>xiv</sup> —Cd2—O11 <sup>xv</sup>    | 171.74 (9) |
| O8—Cd1—O6                                | 93.57 (10)  | O7—Cd2—O1 <sup>xi</sup>                     | 89.92 (7)  |
| O10—Cd1—O2                               | 92.48 (8)   | O7—Cd2—O3 <sup>xii</sup>                    | 177.85 (8) |
| O12—Cd1—O2                               | 95.94 (10)  | O7—Cd2—O5 <sup>xiii</sup>                   | 91.58 (8)  |
| O12—Cd1—O10                              | 169.41 (10) | O7—Cd2—O9 <sup>xiv</sup>                    | 90.84 (9)  |
| O12—Cd1—O6                               | 89.14 (11)  | O7—Cd2—O11 <sup>xv</sup>                    | 89.32 (8)  |
| O6—Cd1—O2                                | 174.52 (9)  | O11 <sup>xv</sup> —Cd2—O1 <sup>xi</sup>     | 96.46 (9)  |
| O6—Cd1—O10                               | 82.24 (9)   | O11 <sup>xv</sup> —Cd2—O5 <sup>xiii</sup>   | 82.20 (8)  |
| [IM]Co(H <sub>2</sub> POO) <sub>3</sub>  |             |                                             |            |
| O2—Co1—O4                                | 89.49 (6)   | O5 <sup>xvii</sup> —Co1—O4                  | 85.51 (6)  |
| O2—Co1—O3 <sup>xvi</sup>                 | 85.45 (6)   | O5 <sup>xvii</sup> —Co1—O3 <sup>xvi</sup>   | 89.13 (7)  |
| O4—Co1—O3 <sup>xvi</sup>                 | 172.74 (6)  | O1 <sup>xviii</sup> —Co1—O2                 | 177.46 (8) |
| O6—Co1—O2                                | 88.98 (6)   | O1 <sup>xviii</sup> —Co1—O4                 | 91.25 (7)  |
| O6—Co1—O4                                | 89.07 (7)   | O1 <sup>xviii</sup> —Co1—O3 <sup>xvi</sup>  | 94.02 (7)  |
| O6—Co1—O3 <sup>xvi</sup>                 | 96.03 (7)   | O1 <sup>xviii</sup> —Co1—O6                 | 88.61 (7)  |
| O6—Co1—O5 <sup>xvii</sup>                | 173.95 (6)  | O1 <sup>xviii</sup> —Co1—O5 <sup>xvii</sup> | 94.19 (8)  |
| O5 <sup>xvii</sup> —Co1—O2               | 88.29 (7)   |                                             |            |
| [PYR]Cd(H <sub>2</sub> POO) <sub>3</sub> |             |                                             |            |
| O6 <sup>xix</sup> —Cd1—O3                | 84.61 (10)  | O2—Cd1—O4                                   | 173.48 (9) |
| O1—Cd1—O6 <sup>xix</sup>                 | 173.19 (17) | O2—Cd1—O5 <sup>xx</sup>                     | 88.52 (9)  |
| O1—Cd1—O2                                | 93.34 (11)  | O4—Cd1—O6 <sup>xix</sup>                    | 83.47 (9)  |
| O1—Cd1—O3                                | 90.0 (2)    | O4—Cd1—O3                                   | 84.11 (8)  |
| O1—Cd1—O4                                | 91.81 (10)  | O4—Cd1—O5 <sup>xx</sup>                     | 95.24 (10) |
| O1—Cd1—O5 <sup>xx</sup>                  | 92.8 (2)    | O5 <sup>xx</sup> —Cd1—O6 <sup>xix</sup>     | 92.51 (11) |

|                          |           |                          |            |
|--------------------------|-----------|--------------------------|------------|
| O2—Cd1—O6 <sup>xix</sup> | 91.05 (9) | O5 <sup>xx</sup> —Cd1—O3 | 177.10 (9) |
| O2—Cd1—O3                | 91.87 (8) |                          |            |

Symmetry code(s): (i)  $-x+y+1, -x+1, z$ ; (ii)  $-y+1, x-y, z$ ; (iii)  $-x+4/3, -y+2/3, -z+2/3$ ; (iv)  $y+1/3, -x+y+2/3, -z+2/3$ ; (v)  $x-y+1/3, x-1/3, -z+2/3$ ; (vi)  $x-y+2/3, -y+4/3, -z+5/6$ ; (vii)  $-x+3/2, -y+1/2, -z+3/2$ ; (viii)  $x, -y, z$ ; (ix)  $-x+1, y, -z+1$ ; (x)  $-x+1, y, -z+2$ ; (xi)  $-x+1, y+1/2, -z+3/2$ ; (xii)  $x, y+1, z$ ; (xiii)  $-x, -y+1, -z+1$ ; (xiv)  $-x+1, -y+1, -z+1$ ; (xv)  $-x, y+1/2, -z+3/2$ ; (xvi)  $x, -y+3/2, z-1/2$ ; (xvii)  $-x+3/2, y-1/2, z$ ; (xviii)  $x+1/2, -y+3/2, -z+1$ ; (xix)  $-x+1/2, y-1/2, z$ ; (xx)  $-x+1/2, y, z+1/2$ ; (xxi)  $-x, -y+1, z$ ; (xxii)  $-x+1, -y+1, z$ .

**Table S3. Selected hydrogen-bond parameters**

| $D-H\cdots A$                                | $D-H$ (Å) | $H\cdots A$ (Å) | $D\cdots A$ (Å) | $D-H\cdots A$ (°) |
|----------------------------------------------|-----------|-----------------|-----------------|-------------------|
| <b>[GUA]Cd(H<sub>2</sub>POO)<sub>3</sub></b> |           |                 |                 |                   |
| N1—H1A $\cdots$ O1 <sup>iii</sup>            | 0.86      | 2.11            | 2.9410 (17)     | 162.8             |
| N1—H1B $\cdots$ O1                           | 0.86      | 2.11            | 2.9410 (17)     | 162.8             |
| <b>[GUA]Co(H<sub>2</sub>POO)<sub>3</sub></b> |           |                 |                 |                   |
| N1—H1A $\cdots$ O1 <sup>i</sup>              | 0.86      | 2.08            | 2.8971 (17)     | 159.3             |
| N1—H1B $\cdots$ O1                           | 0.86      | 2.07            | 2.8971 (17)     | 162.5             |
| N2—H2C $\cdots$ O2 <sup>ii</sup>             | 0.86      | 2.11            | 2.957 (2)       | 170.5             |
| N2—H2D $\cdots$ O3 <sup>i</sup>              | 0.86      | 2.27            | 2.958 (2)       | 136.6             |
| <b>[IM]Co(H<sub>2</sub>POO)<sub>3</sub></b>  |           |                 |                 |                   |
| N1—H1 $\cdots$ O2 <sup>ii</sup>              | 0.77 (3)  | 2.48 (3)        | 2.961 (3)       | 122 (3)           |
| N1—H1 $\cdots$ O3 <sup>i</sup>               | 0.77 (3)  | 2.17 (3)        | 2.894 (3)       | 157 (3)           |
| N2—H2 $\cdots$ O4                            | 0.85 (3)  | 1.95 (3)        | 2.741 (3)       | 154 (3)           |
| N2—H2 $\cdots$ O5 <sup>iii</sup>             | 0.85 (3)  | 2.51 (3)        | 3.073 (3)       | 124 (3)           |
| <b>[IM]Cd(H<sub>2</sub>POO)<sub>3</sub></b>  |           |                 |                 |                   |
| N8—H8 $\cdots$ O10 <sup>iv</sup>             | 0.86      | 2.01            | 2.793 (3)       | 151.7             |
| N6—H6 $\cdots$ O2                            | 0.86      | 1.91            | 2.762 (3)       | 169.8             |
| N3—H3 $\cdots$ O5 <sup>v</sup>               | 0.86      | 1.98            | 2.781 (3)       | 153.8             |
| N1—H1 $\cdots$ O1                            | 0.86      | 1.95            | 2.757 (3)       | 156.5             |
| C7—H7 $\cdots$ O4                            | 0.93      | 2.28            | 3.050 (4)       | 139.7             |
| C5—H5 $\cdots$ O8                            | 0.93      | 2.39            | 3.276 (4)       | 160.4             |
| <b>[PYR]Cd(H<sub>2</sub>POO)<sub>3</sub></b> |           |                 |                 |                   |
| N1—H1E $\cdots$ O6                           | 0.89      | 1.95            | 2.813 (4)       | 162.7             |
| N1—H1F $\cdots$ O3 <sup>vi</sup>             | 0.89      | 2.08            | 2.914 (3)       | 156.7             |

Symmetry code(s): (iii)  $-x+2/3, -x+y+1/3, -z+5/6$ ; (i)  $x, -y+1, z$ ; (ii)  $x-1/2, y+1/2, z+1/2$ ; (I)  $-x+1, y-1/2, -z+3/2$ ; (II)  $-x+1, -y+1, -z+1$ ; (III)  $-x+3/2, y-1/2, z$ ; (IV)  $-x+1, -y, -z+1$ ; (V)  $-x+1, -y+1, -z+1$ ; (VI)  $x+1/2, -y+3/2, z$ .

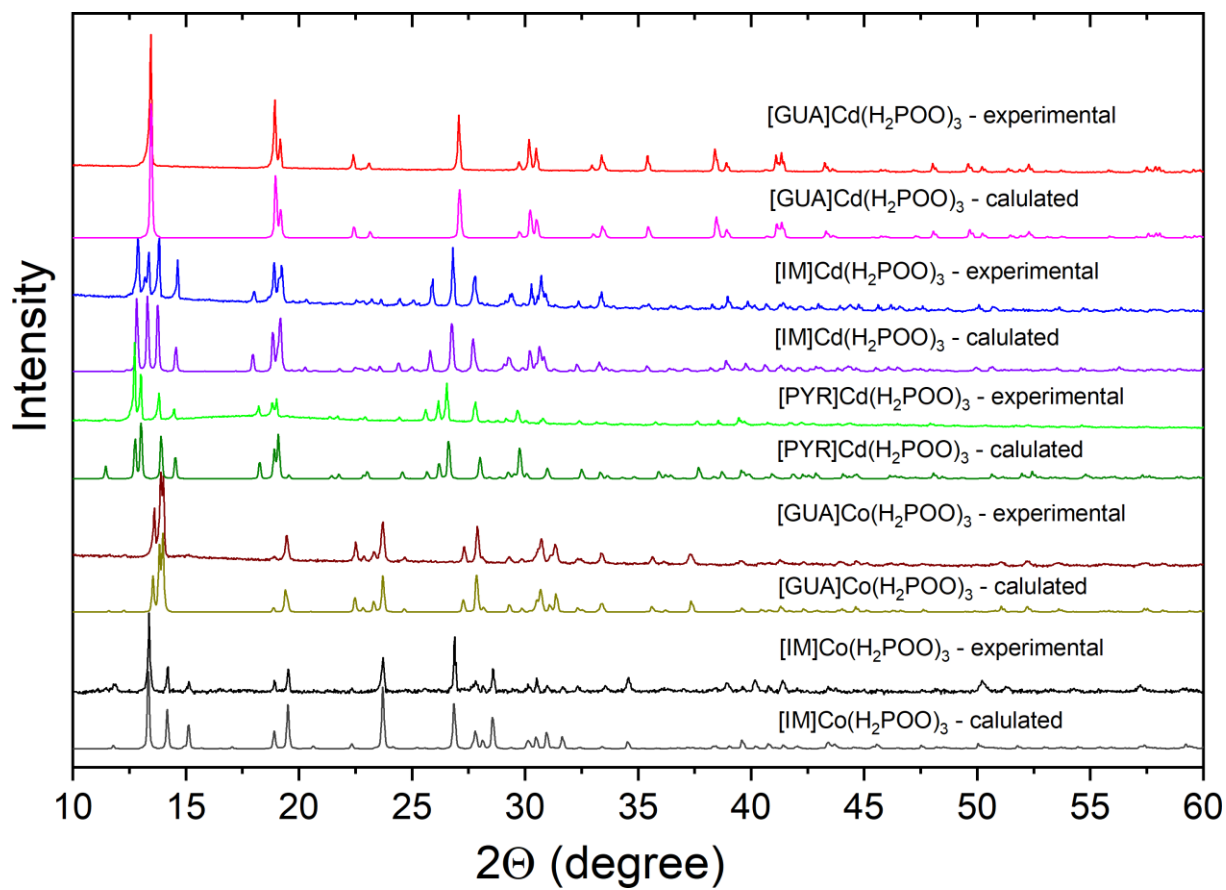

Figure S1. Experimental XRD patterns of the studied compounds together with the calculated ones based on the RT crystal structures.



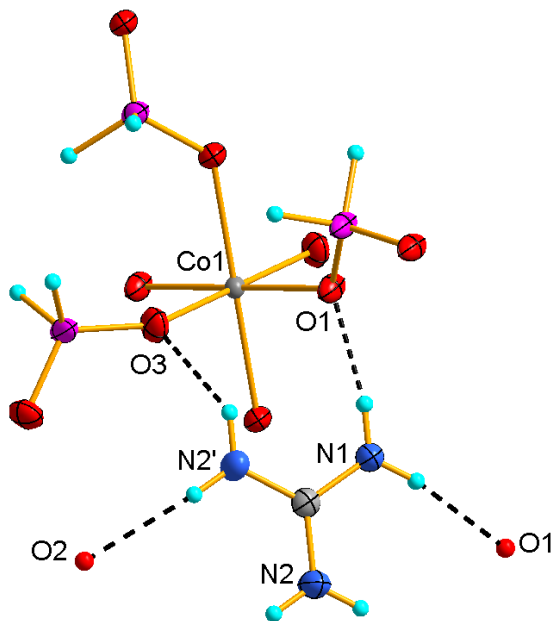

*[GUA]Co(H<sub>2</sub>POO)<sub>3</sub>*

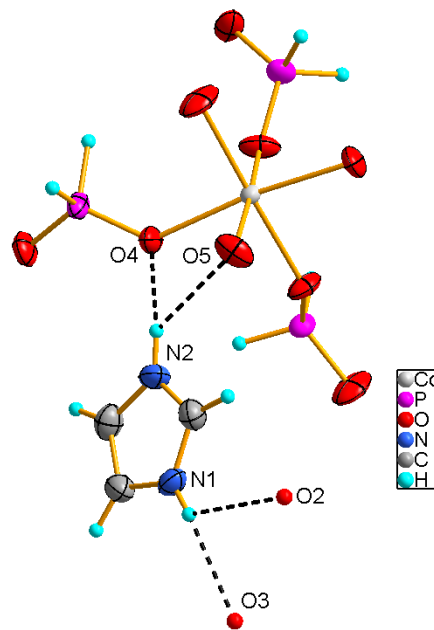

*[IM]Co(H<sub>2</sub>POO)<sub>3</sub>*

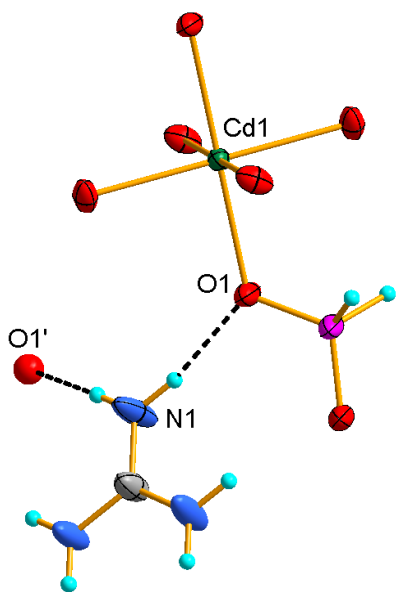

*[GUA]Cd(H<sub>2</sub>POO)<sub>3</sub>*

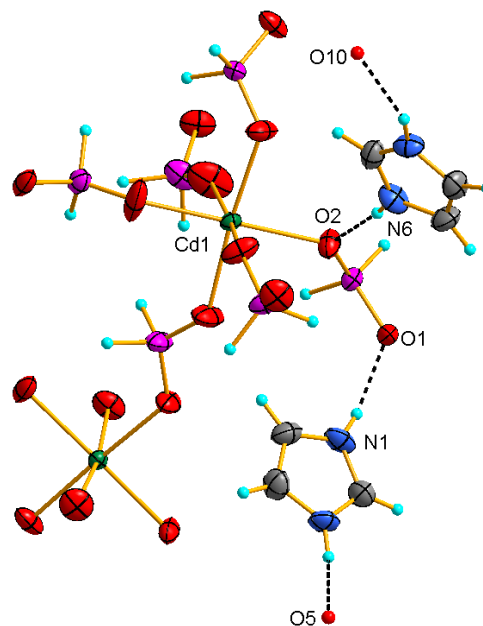

*[IM]Cd(H<sub>2</sub>POO)<sub>3</sub>*

Figure S2. The asymmetric units (atom drawn as front ellipses) together with hydrogen bond interactions (black dashed lines) in a series of Co and Cd hypophosphites. The ellipsoids are drawn at a 50% probability level.

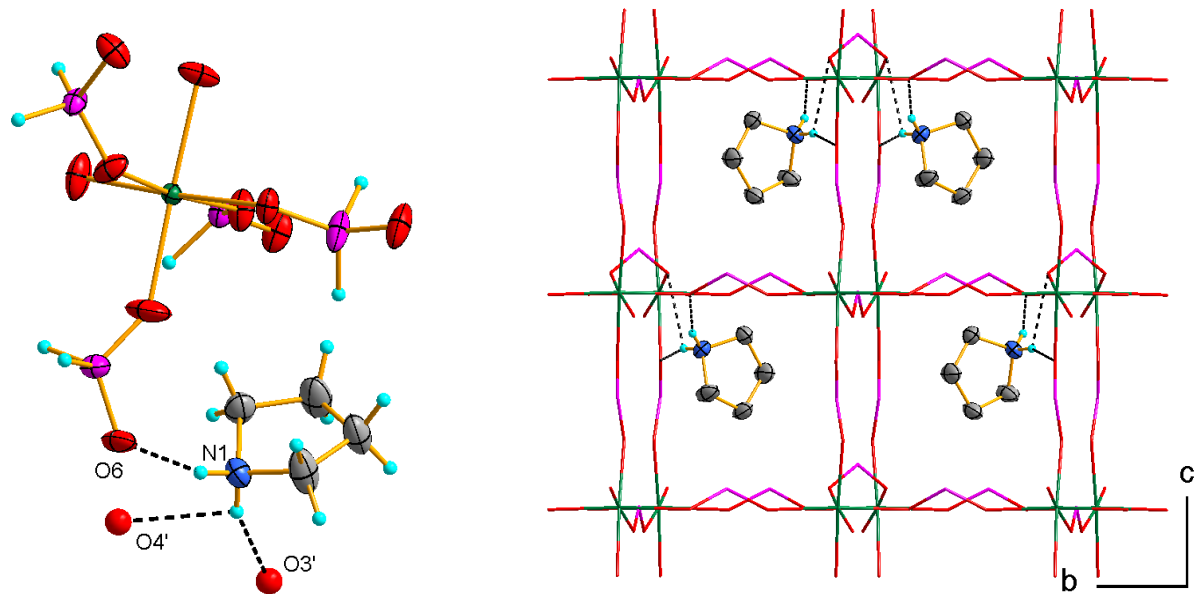

Figure S3 The asymmetric unit for  $[\text{PYR}]\text{Cd}(\text{H}_2\text{POO})_3$  (left); the distribution of  $\text{PYR}^+$  in  $1/2a, b, c$  cell (right).

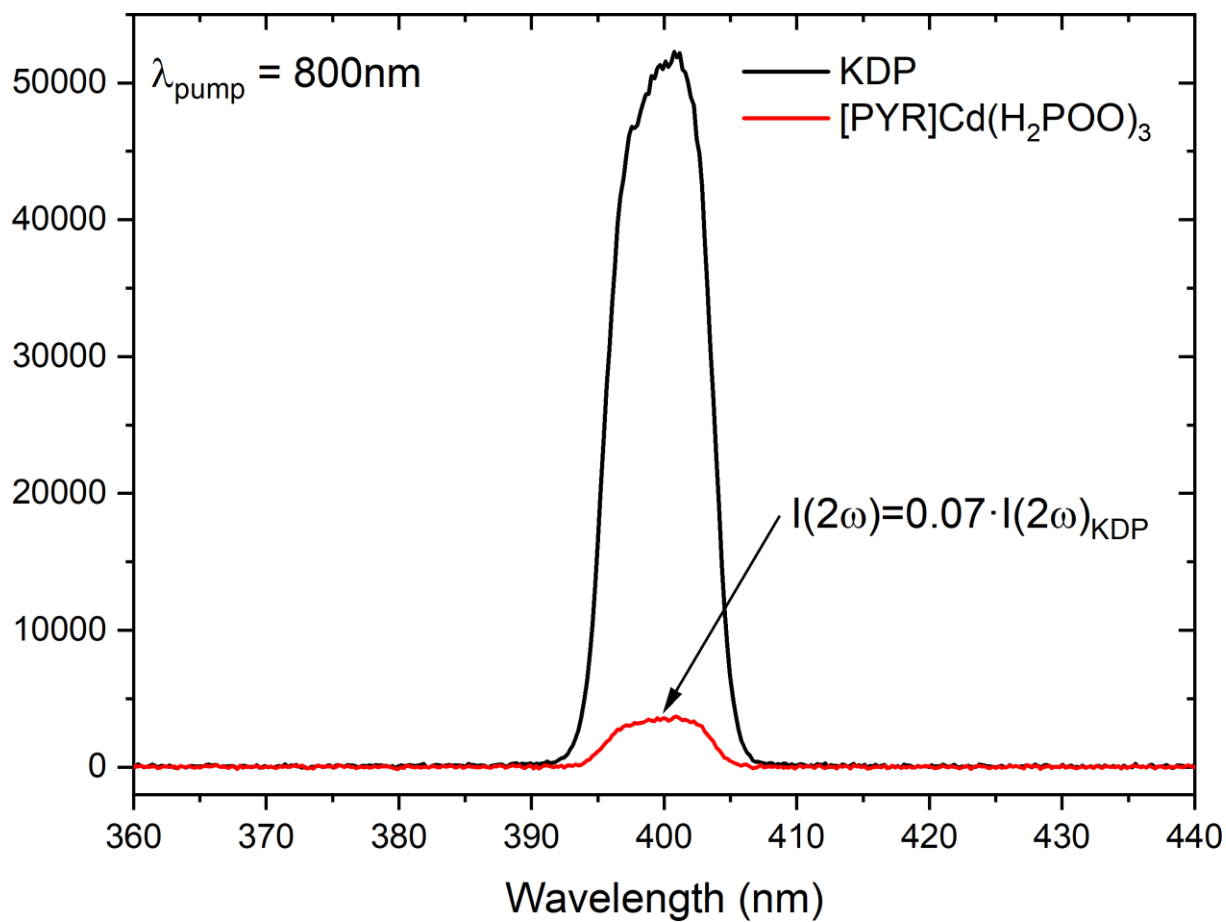

Figure S4. A comparison of SHG traces for [PYR]Cd(H<sub>2</sub>POO)<sub>3</sub> (red) and that of KDP (black). The collection time of SHG signals for both, [PYR]Cd(H<sub>2</sub>POO)<sub>3</sub> and KDP, was equal to 1000 ms. Powders of both compounds were sieved into 88 - 125  $\mu\text{m}$  particle size range.

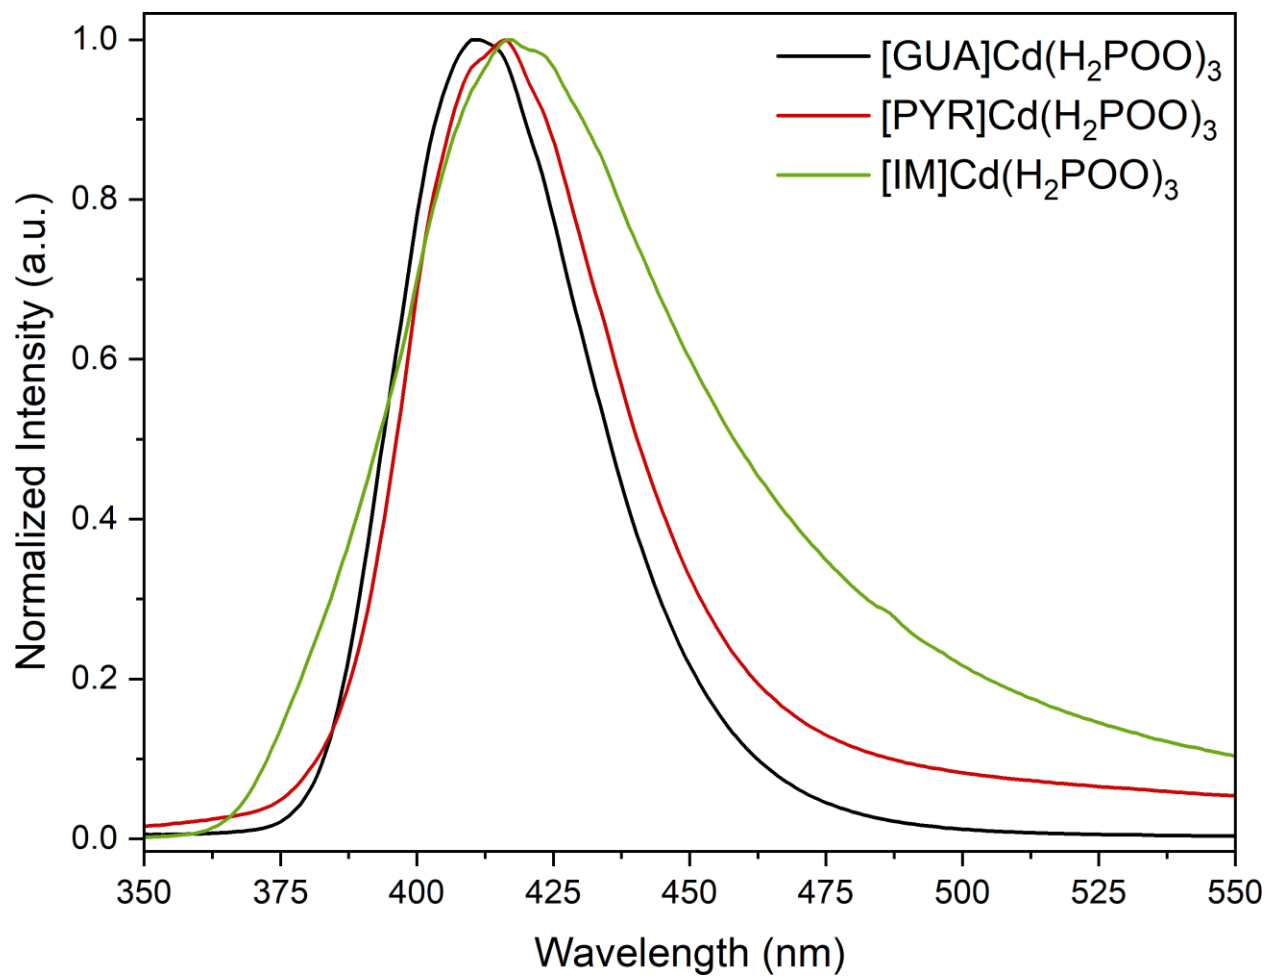

Figure S5. Normalized emission spectra of [GUA]Cd(H<sub>2</sub>POO)<sub>3</sub> (black line), [PYR]Cd(H<sub>2</sub>POO)<sub>3</sub> (red line), and [IM]Cd(H<sub>2</sub>POO)<sub>3</sub> (green line) registered at 80 K.

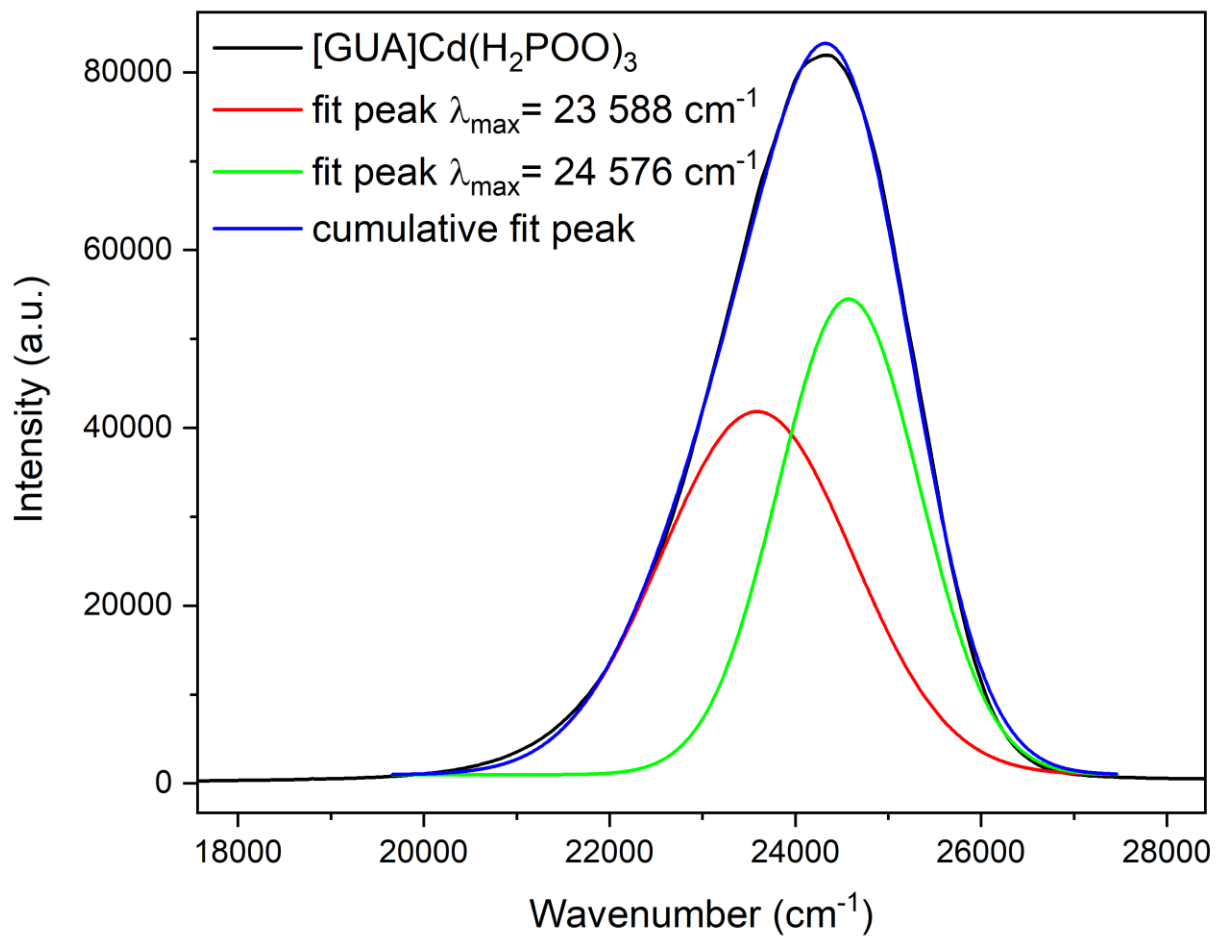

Figure S6. Deconvolution of [GUA]Cd(H<sub>2</sub>POO)<sub>3</sub> sample emission spectrum recorded under 266 nm at 80 K.

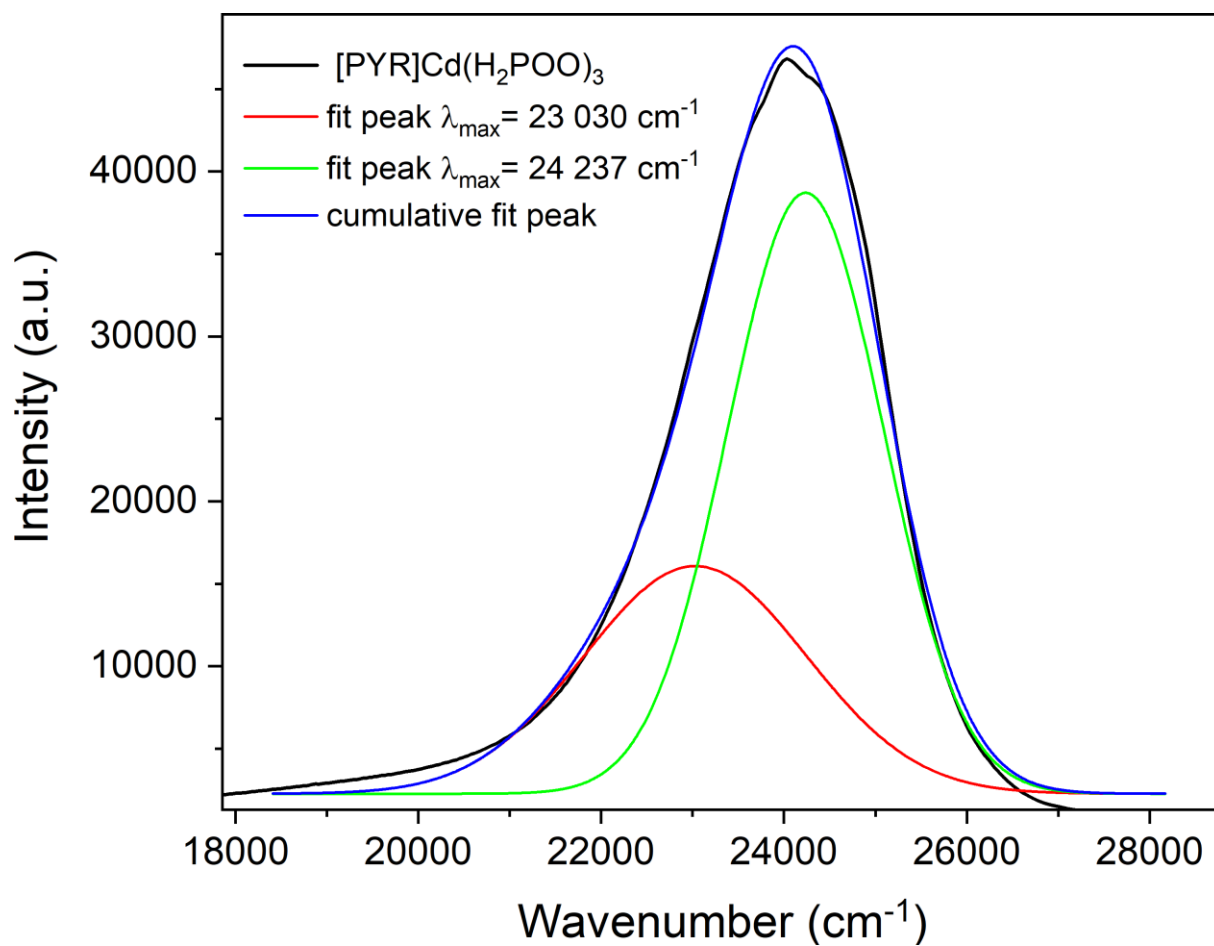

Figure S7. Deconvolution of [PYR]Cd(H<sub>2</sub>POO)<sub>3</sub> sample emission spectrum recorded under 266 nm at 80 K.

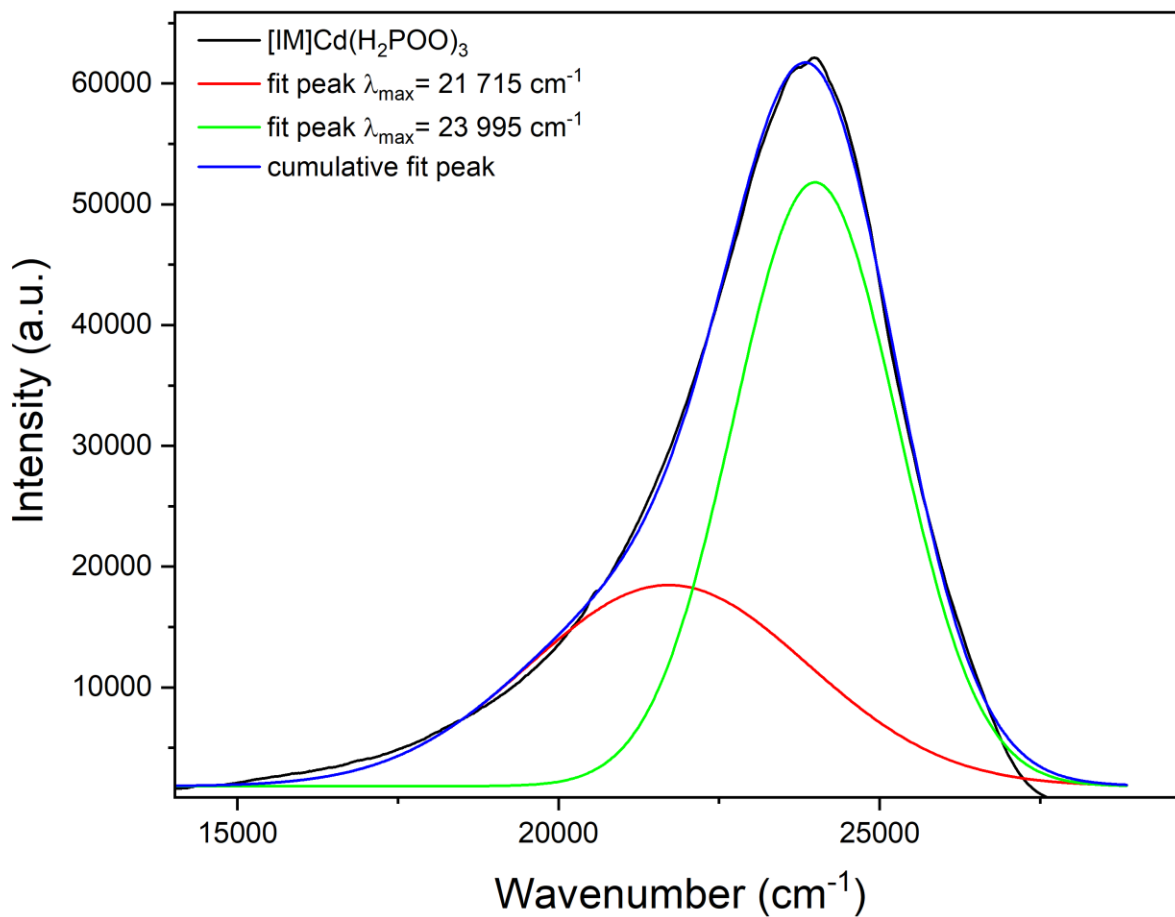

Figure S8. Deconvolution of [IM]Cd(H<sub>2</sub>POO)<sub>3</sub> sample emission spectrum recorded under 266 nm at 80 K.

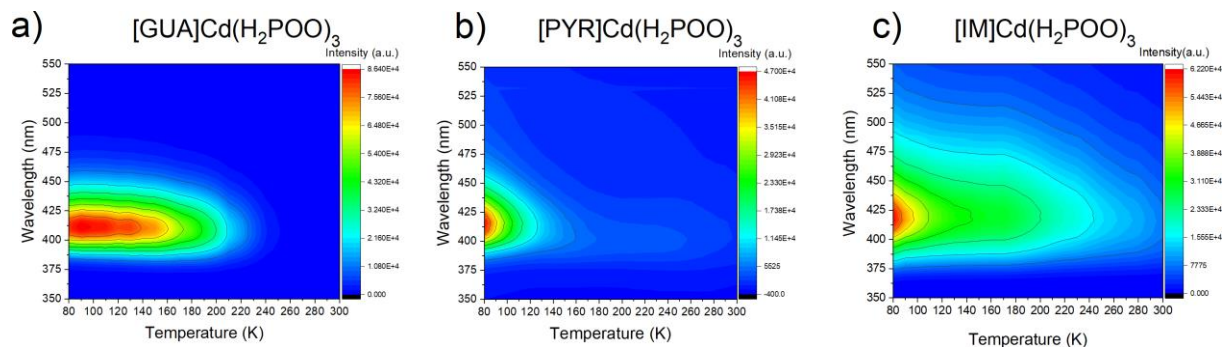

Figure S9. Thermal evolution of emission intensity (contour map) of (a) [GUA]Cd(H<sub>2</sub>POO)<sub>3</sub>, (b) [PYR]Cd(H<sub>2</sub>POO)<sub>3</sub> and (c) [IM]Cd(H<sub>2</sub>POO)<sub>3</sub>.

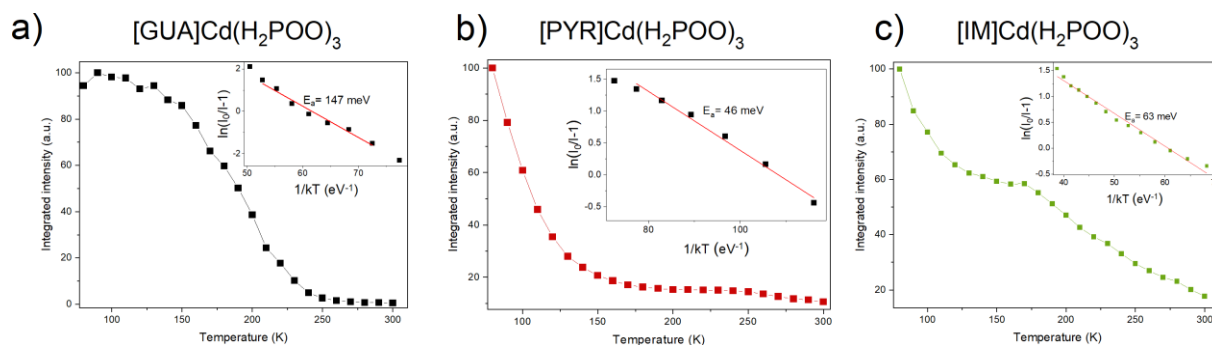

Figure S10. Integrated emission intensity as a function of temperature, in the inset activation energies ( $E_a$ ) calculated from a function of  $\ln(I_0/I-1)$  versus  $1/kT$  for (a) [GUA]Cd(H<sub>2</sub>POO)<sub>3</sub>, (b) [PYR]Cd(H<sub>2</sub>POO)<sub>3</sub> and (c) [IM]Cd(H<sub>2</sub>POO)<sub>3</sub>.
